# Supplementary material for: Understanding Self-Injury: A Person-Centered Approach
Source: Atypon-hosted journal article supplement (doi:10.1176/appi.ps.202000396), 2021-03-26
Supplement: appi.ps.202000396.ds001.pdf [file appi.ps.202000396.ds001.pdf]

**Online supplement for Lewis and Hasking, DOI: 10.1176/appi.ps.202000396**

Strategies to draw on when using a person-centred approach when responding to and supporting someone who engages in self-injury

| <b><u>STRATEGY</u></b>                                                   | <b><u>EXAMPLES</u></b>                                                                                                                                                                                                                                                                                                                                                                                                                                                                                                                                                                                                                                                                                                                                                                                                                                                                                                                                                                                                 |
|--------------------------------------------------------------------------|------------------------------------------------------------------------------------------------------------------------------------------------------------------------------------------------------------------------------------------------------------------------------------------------------------------------------------------------------------------------------------------------------------------------------------------------------------------------------------------------------------------------------------------------------------------------------------------------------------------------------------------------------------------------------------------------------------------------------------------------------------------------------------------------------------------------------------------------------------------------------------------------------------------------------------------------------------------------------------------------------------------------|
| <b>Acknowledge self-injury is difficult to talk about</b>                | <ul style="list-style-type: none"> <li>● I know self-injury can be hard to talk about for a lot of people. But I'd like to learn more about your experience.</li> <li>● I recognise that this is hard to talk about. I appreciate you're willing to talk about your self-injury with me.</li> <li>● I can see this is difficult for you to talk about but I'd like you to know that I'm here to listen when you are ready to talk about it.</li> </ul>                                                                                                                                                                                                                                                                                                                                                                                                                                                                                                                                                                 |
| <b>Respectful Curiosity</b>                                              | <ul style="list-style-type: none"> <li>● Sometimes when people have difficulty coping, they intentionally hurt themselves without wanting to die. Is this something you have done in the past?</li> <li>● When people experience some of the difficulties you've mentioned they respond by self-injuring without wanting to die. I'm wondering if this has happened for you?</li> <li>● Can you help me understand how self-injury works for you?</li> <li>● Can you help me understand what makes it difficult for you to talk about self-injury?</li> <li>● Can you describe what makes it hard for you when you have an urge to self-injure?</li> <li>● I'd like to understand more about your experience. Could you tell me a bit about why you self-injure?</li> <li>● Some people say they self-injure to cope when they feel really overwhelmed. I'm curious if this is the case for you?</li> <li>● Have you ever had thoughts of ending your life when you self-injure? What about at other times?</li> </ul> |
| <b>Acknowledge self-injury serves a purpose</b>                          | <ul style="list-style-type: none"> <li>● It sounds like self-injury helps you to feel a bit better when you're really distressed and overwhelmed.</li> <li>● Given what you've shared, I can understand why you feel the need to self-injure when you're so upset.</li> <li>● I can see that self-injury helps you to cope when things get really difficult.</li> </ul>                                                                                                                                                                                                                                                                                                                                                                                                                                                                                                                                                                                                                                                |
| <b>Acknowledge that individuals may not be ready to stop self-injury</b> | <ul style="list-style-type: none"> <li>● You said that self-injury helps you when you're really overwhelmed. Because of this, I can see why you may not be ready to stop.</li> <li>● Given what you said about why you self-injure, I can see how it would be difficult to stop.</li> <li>● I can understand you're not ready to stop self-injuring. It is not uncommon for people to go back and forth about whether they want to stop or not</li> </ul>                                                                                                                                                                                                                                                                                                                                                                                                                                                                                                                                                              |
| <b>Use a person's language</b>                                           | <ul style="list-style-type: none"> <li>● If the individual refers to "cutting" vs. self-injury: <i>Can you tell me more about your cutting?</i></li> </ul>                                                                                                                                                                                                                                                                                                                                                                                                                                                                                                                                                                                                                                                                                                                                                                                                                                                             |

|                                                     |                                                                                                                                                                                                                                                                                                                                                                                |
|-----------------------------------------------------|--------------------------------------------------------------------------------------------------------------------------------------------------------------------------------------------------------------------------------------------------------------------------------------------------------------------------------------------------------------------------------|
| <b>Avoid value-laden, labeling language</b>         | <ul style="list-style-type: none"><li>• Terms to avoid: maladaptive, unhealthy, or dysfunctional coping/behaviour; cutter, self-injurer, self-harmer</li></ul>                                                                                                                                                                                                                 |
| <b>Focus on strengths</b>                           | <ul style="list-style-type: none"><li>• Highlight times when an urge was not acted on, especially if the individual does not acknowledge it or dismisses it</li><li>• Highlight effort/courage when someone discloses difficult experiences</li><li>• Highlight the effort needed to try different coping strategies</li></ul>                                                 |
| <b>Draw on motivational interviewing approaches</b> | <ul style="list-style-type: none"><li>• What are some of the advantages of continuing to self-injure?</li><li>• What are some of the disadvantages?</li><li>• If you woke up tomorrow morning and self-injury was no longer part of your life, how would you know? What would be different?</li><li>• How much do you believe you can resist an urge to self-injure?</li></ul> |
